# Supplementary material
Source: PubMed Central journal article supplement (PMC4817877)
Supplement: mt2015109x1.pdf [file mt2015109x1.pdf]

**Supplemental Figure 1. Patient flow chart.**

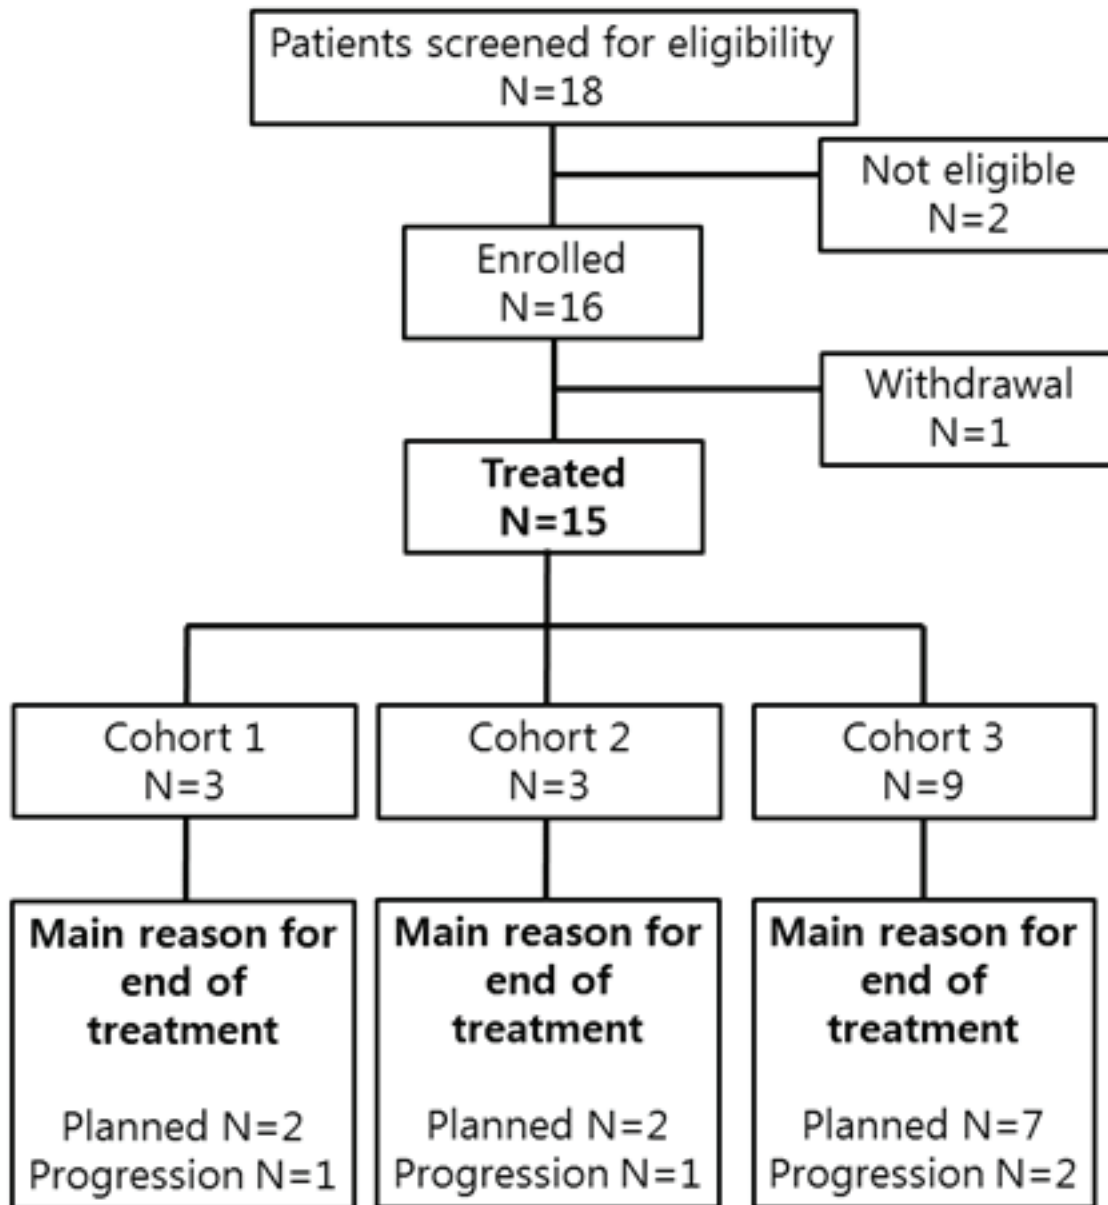

**Supplementary Table 1.** Adverse events observed during study period (treatment-related)

| Adverse Event (MedDRA) | <1 x 10 <sup>9</sup> pfu (n=6) |         |             |       | ≥1 x 10 <sup>9</sup> pfu (n=9) |         |             |       | TOTAL (n=15) |         |             |          |
|------------------------|--------------------------------|---------|-------------|-------|--------------------------------|---------|-------------|-------|--------------|---------|-------------|----------|
|                        | Grade 1/2                      | Grade 3 | Grade 4 (5) | Total | Grade 1/2                      | Grade 3 | Grade 4 (5) | Total | Grade 1/2    | Grade 3 | Grade 4 (5) | Total    |
| Chills                 | 5                              | 0       | 0           | 5     | 9                              | 0       | 0           | 9     | 14           | 0       | 0           | 14 (93%) |
| Pyrexia                | 6                              | 0       | 0           | 6     | 8                              | 0       | 0           | 8     | 14           | 0       | 0           | 14 (93%) |
| Headache               | 5                              | 0       | 0           | 5     | 4                              | 0       | 0           | 4     | 9            | 0       | 0           | 9 (60%)  |
| Nausea                 | 5                              | 0       | 0           | 5     | 3                              | 0       | 0           | 3     | 8            | 0       | 0           | 8 (53%)  |
| Rash papulopustular    | 0                              | 0       | 0           | 0     | 7                              | 0       | 0           | 7     | 7            | 0       | 0           | 7 (47%)  |
| Hypotension            | 2                              | 0       | 0           | 2     | 4                              | 0       | 0           | 4     | 6            | 0       | 0           | 6 (40%)  |
| Decreased appetite     | 2                              | 0       | 0           | 2     | 3                              | 0       | 0           | 3     | 5            | 0       | 0           | 5 (33%)  |
| Rash                   | 1                              | 0       | 0           | 1     | 3                              | 0       | 0           | 3     | 4            | 0       | 0           | 4 (27%)  |
| Pain                   | 1                              | 0       | 0           | 1     | 2                              | 0       | 0           | 2     | 3            | 0       | 0           | 3 (20%)  |
| Stomatitis             | 1                              | 0       | 0           | 1     | 2                              | 0       | 0           | 2     | 3            | 0       | 0           | 3 (20%)  |
| Vomiting               | 1                              | 0       | 0           | 1     | 2                              | 0       | 0           | 2     | 3            | 0       | 0           | 3 (20%)  |
| Constipation           | 1                              | 0       | 0           | 1     | 1                              | 0       | 0           | 1     | 2            | 0       | 0           | 2 (13%)  |
| Diarrhoea              | 2                              | 0       | 0           | 2     | 0                              | 0       | 0           | 0     | 2            | 0       | 0           | 2 (13%)  |
| Fatigue                | 2                              | 0       | 0           | 2     | 0                              | 0       | 0           | 0     | 2            | 0       | 0           | 2 (13%)  |
| Hypertension           | 0                              | 0       | 0           | 0     | 2                              | 0       | 0           | 2     | 2            | 0       | 0           | 2 (13%)  |
| Productive cough       | 0                              | 0       | 0           | 0     | 2                              | 0       | 0           | 2     | 2            | 0       | 0           | 2 (13%)  |
